# Supplementary material
Source: publisher figshare collection journal article supplement (https://tandf.figshare.com/ndownloader/files/15327641)
Supplement: Supplementary file 1 [file 15327641]

## Sheet: Sheet1
Supplement Table S1: Demograpic and clinical examination data of Usher syndrome in Russian cohort
Demographic data							Clinical data										Family History
Patient ID	Age	Gender	Ethnicity	Height (cm)	Weight (kg)	Head circumference, cm	Hearing loss start. y.o.	Vision loss start, y.o.	USH Type	Color test result	Visual function OD, BCVA	Visual function OS, BCVA	Hearing function AD	Hearing function AS	Vestibular function	FLORA mobility test	Relatives diseases	Сhildren
1	26	M	Hebrew/Russian	186	90	59	2	13	2	12	0.3	0.4	3	3	normal, borderline	35	sibs sister - RP	no children
2	57	M	Ukraine	180	87	57	3	3	1	NA	0.1	0.05	4	4	severe impairment	22	wife - hearing loss	son and grandson, healthy
3	40	F	Poland/Ukraine/Hebrew	164	70	54	15	15	other syndrome	38	0.02	0.02	3	4	NA	19	mother cataract, hearing loss, vestibular impairment, grandmother hearing and visual loss, father glaucoma, grandmother (father side) blind for one eye	no children
4	65	F	Slavonian	NA	NA	NA	NA	NA	2	NA	pr l certae tunnel vision	pr l certae tunnel vision	2	2	NA	NA	NA	NA
5	51	M	Slavonian/Ukraine	184	89	56	1	5	2	NA	pr l certae	pr l certae	4	4	normal, borderline	16	none	no children
6	60	M	Slavonian	168	85	55	1	26	1	NA	pr l certae	pr l certae	4	4	normal	17	none	no children
7	35	F	Slavonian	165	65	55	0	27	1	NA	0	pr l incertae	4	4	reduced	9	none	daughter, healthy
8	59	F	Slavonian	156	72	52	5	10	2	NA	pr l certae	pr l certae	4	4	reduced	10	father became deaf in old age, grand-mother (father side) became blind after 60 yo	2 sons (1980, 1985 yb healthy) 1 grand-daughter, 1 grand-son (healthy)
9	52	F	Slavonian	164	75	53	7	7	2	NA	0.2	0.2	3	3	normal, borderline	24	grand-grandmother (father's side) deaf	daughter, healthy
10	35	F	Ukraine	168	52	55.5	0	5	1	10	0.3	0.3	4	4	normal	35	none	no children
11	65	M	Slavonian	178	71	53	6	22	2	NA	Hand motion	Hand motion	4	4	NA	NA	sibs sister - USH, aunt (father side - USH)	1 son 1981 yb healthy 3 grandchildren healthy
12	50	M	Slavonian	171	94	59	9	9	2	36	0.4	0.4	4	4	NA	28	none	1 daughter 29 yo healthy
13	36	F	Slavonian	NA	NA	NA	NA	NA	1	NA	pr l certae tunnel vision	pr l certae tunnel vision	3	3	borderline	NA	NA	NA
14	31	F	Belorus	175	59	57	11	3	other syndrome	NA	pr l certae	pr l certae	3	3	reduced	4	father has similar phenotype***	no children
15	64	F	Slavonian	158	44	53	0	15	1	NA	pr l incertae	pr l incertae	4	4	severe impairment	9	none	1 son 1977 yb 1 daughter 1982 yb
16	37	F	Slavonian	164	62	56	3	10	1	62	0.4	0.4	3	3	normal	25	father hearing loss, grandmother (father's side) nictalopia, glaucoma, grandfather (mother's side) hearing loss	1 daugher 1999 yb
17	34	M	Slavonian	182	89	56	2	7	2	20	0.2	0.3	4	4	normal, borderline	35	sib sister hearing loss	no children
18	49	M	Slavonian	180	81	59	5	5	1	32	0.3	0.04	4	4	NA	35	none	1 daughter 26 yo
19	53	F	Slavonian	156	55	56	5	5	1	NA	Counting fingers	Counting fingers	4	4	NA	5	none	1 daughter 26 yo
20	57	F	Slavonian	NA	NA	NA	NA	NA	2	NA	0,01 tunnel vision	0,01 tunnel vision	4	4	borderline	NA	NA	NA
21	61	M	Slavonian	NA	NA	58	1	7	1	NA	pr l certae tunnel vision	pr l certae tunnel vision	4	4	NA	NA	none	1 daughter 1979 yb 1 grand-daughter healthy
22	61	F	Slavonian	NA	NA	NA	NA	NA	1	NA	0,01 tunnel vision	pr l certae tunnel vision	4	4	borderline	NA	NA	NA
23	36	F	Slavonian	168	65	55	0	5	1	86	0.2	0.2	4	4	reduced	32	none	no children
24	36	F	Slavonian	170	56	56	4	4	2	8	0.4	0.3	2	2	normal	22.5	none	3 sons (2005, 2011, 2011 yb) healthy
25	43	M	Chuvash/ Slavonian	165	63	56.5	6	3	1	na	Hand motion	pr. l. certae	3	3	normal	15	none	no children
26	64	F	Slavonian	NA	NA	NA	NA	NA	1	NA	pr l certae tunnel vision	pr l certae tunnel vision	3	4	NA	NA	NA	NA
27	51	F	Slavonian	164	83	NA	1	1	1	70	0.01	0.05	4	4	NA	32	NA	NA
28	36	F	Slavonian	164	54	55	11	11	2	12	0.9	0.9	1	1	NA	30	none	1 son 2006 yb healthy
